# Supplementary material
Source: MDPI journal article supplement (https://www.mdpi.com/2379-139X/9/2/59)
Supplement: s1 [file s1]

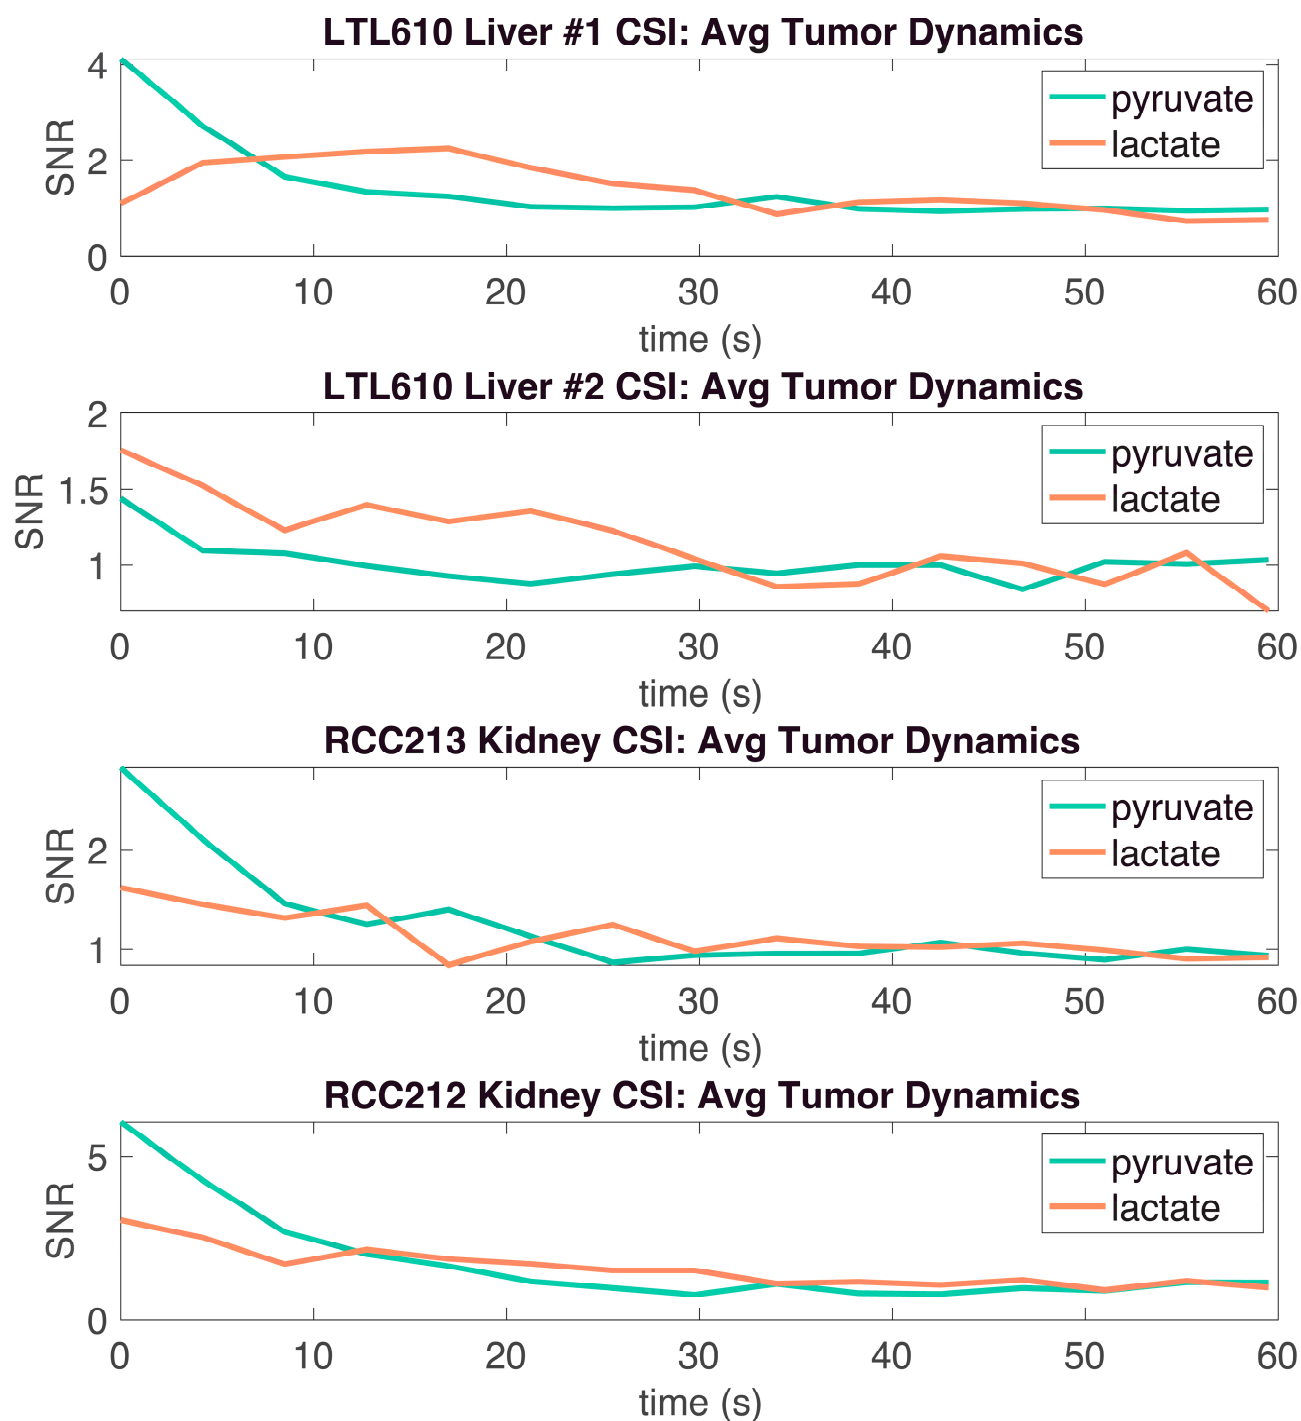

**Figure S1.** Average pyruvate and lactate CSI dynamics across tumor for four different mice. For all of these acquisitions a CSI flip angle of 10 degrees was used.
